# Supplementary material
Source: PubMed Central journal article supplement (PMC7958996)
Supplement: NIHMS1649368-supplement-1.pdf [file NIHMS1649368-supplement-1.pdf]

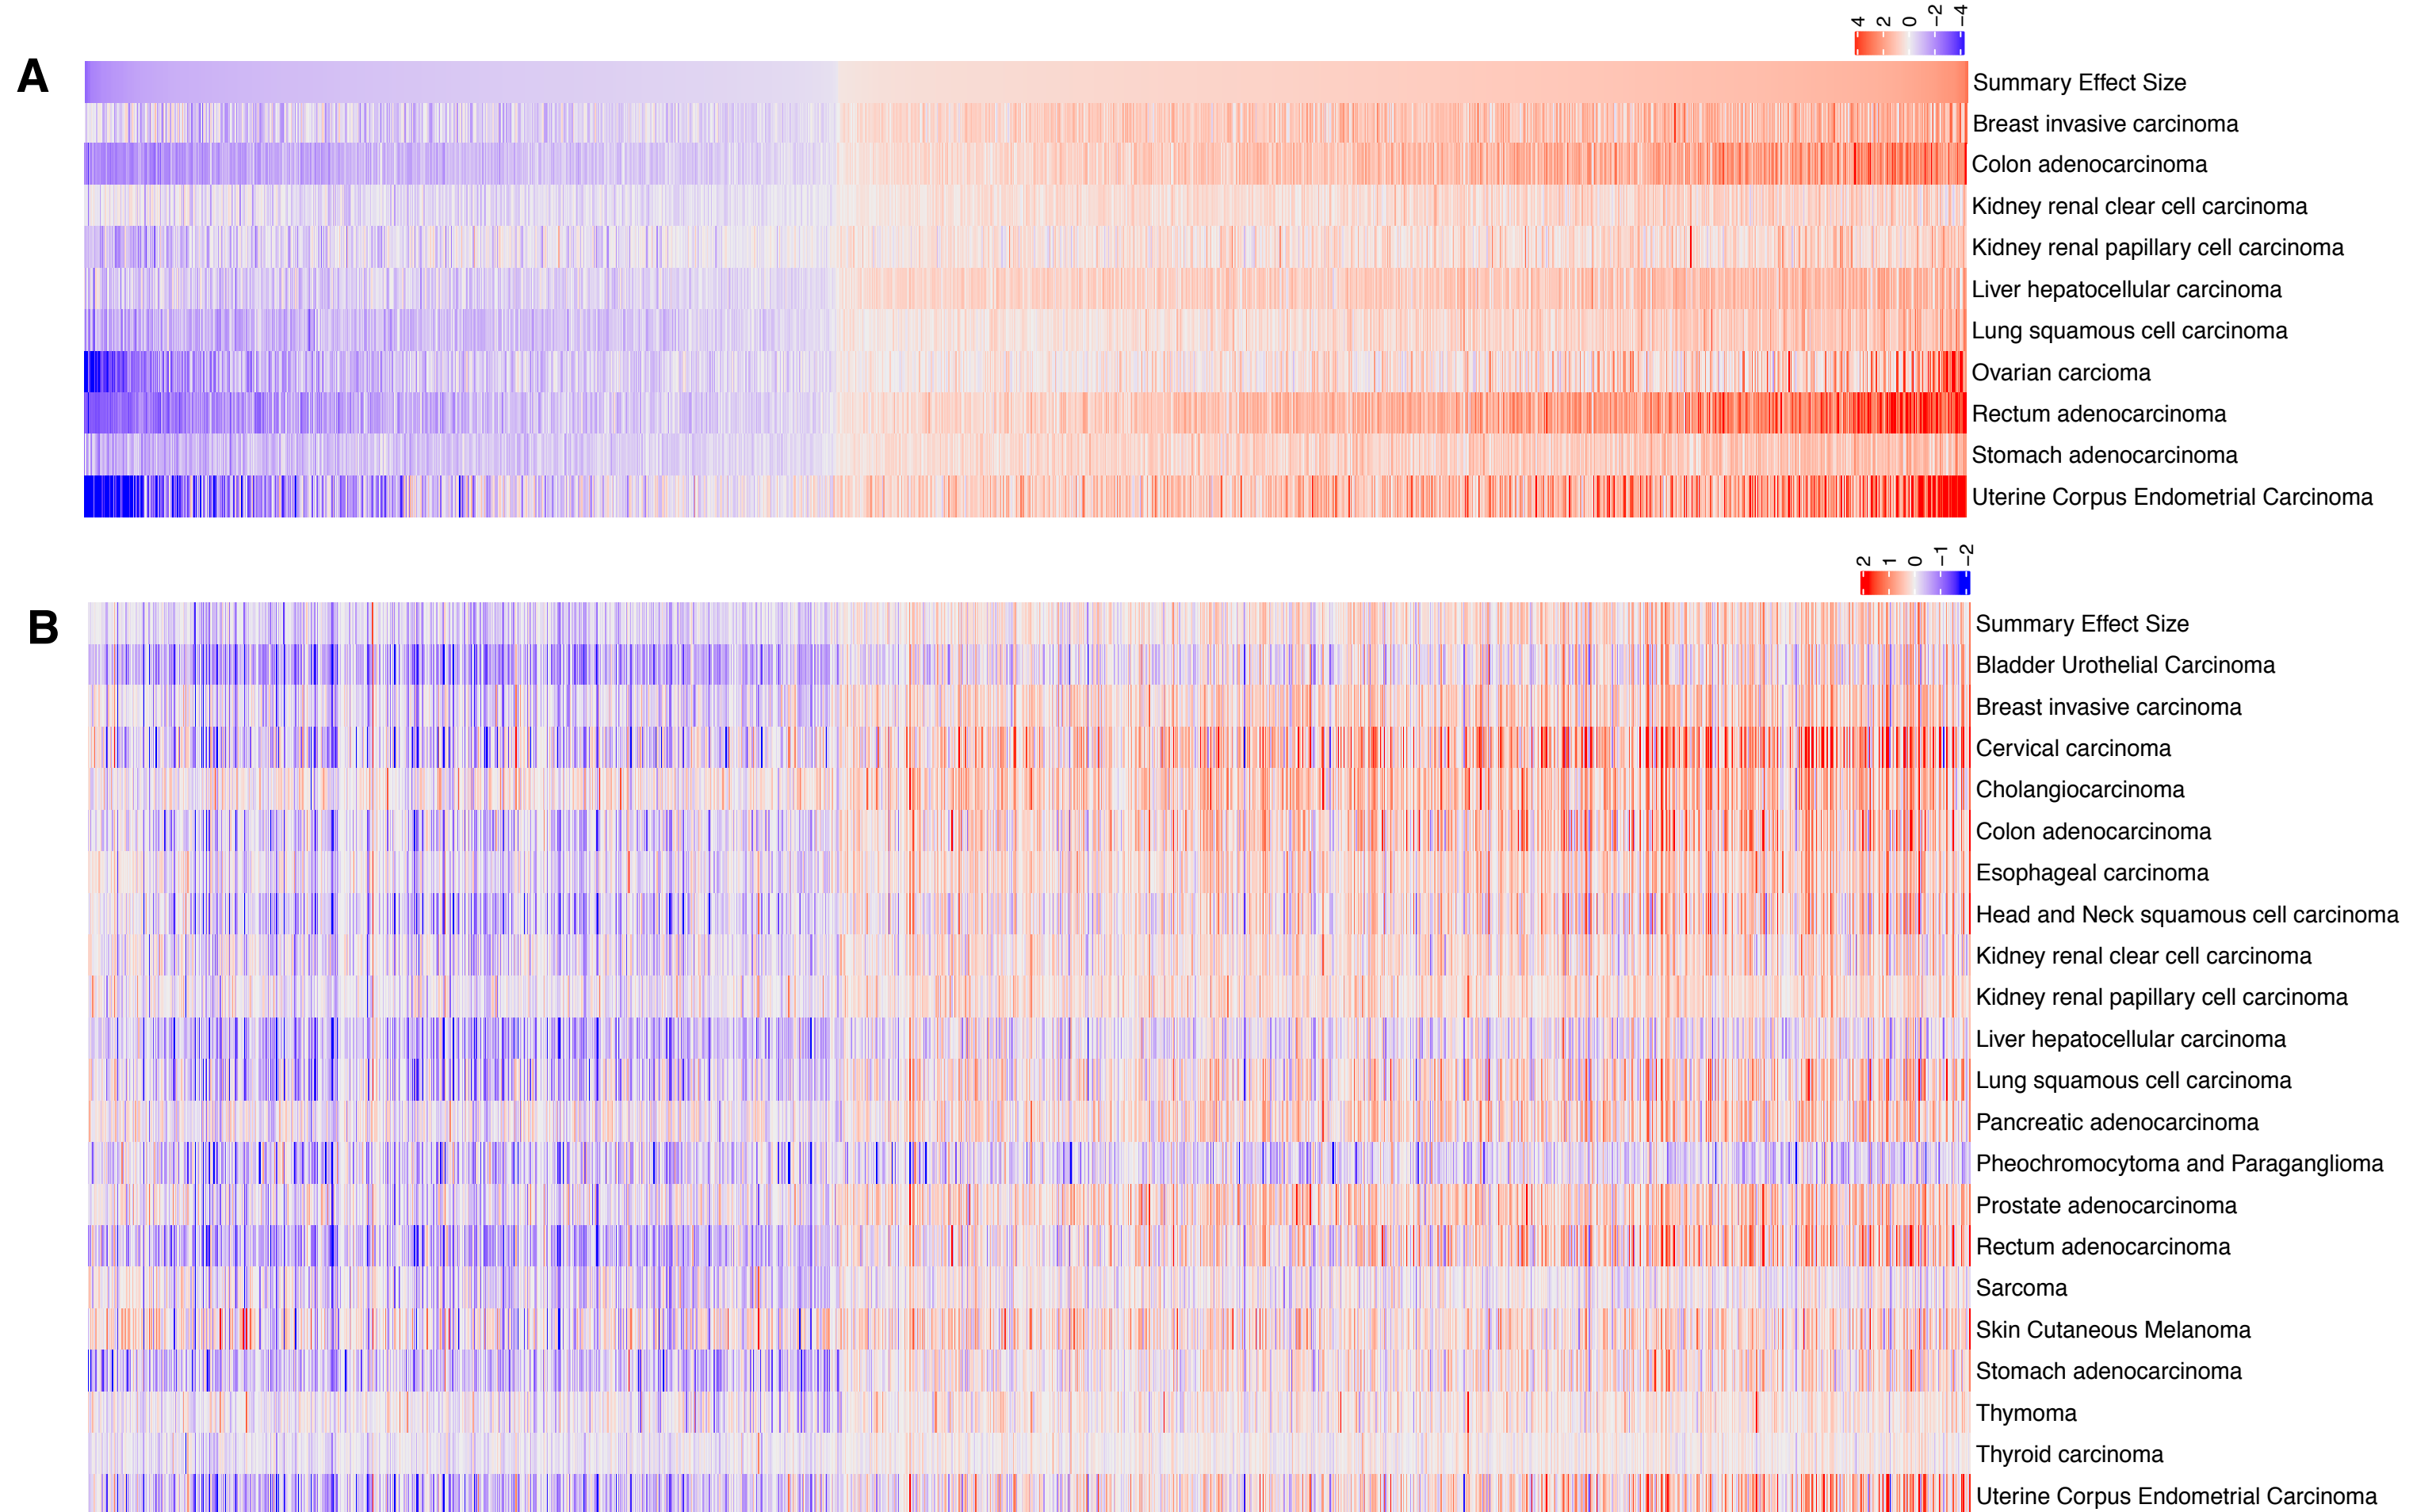

**Supplemental Figure 1.** 1,801 differentially methylated genes (1,081 hyper- and 720 hypomethylated, FDR < 5%) across all cancers. Top row indicates the summary effect size across all cancers in **(A)** the discovery data using the Illumina 27 platform and **(B)** validation data on the Illumina 450 platform. Gene order is maintained between **(A)** and **(B)**.

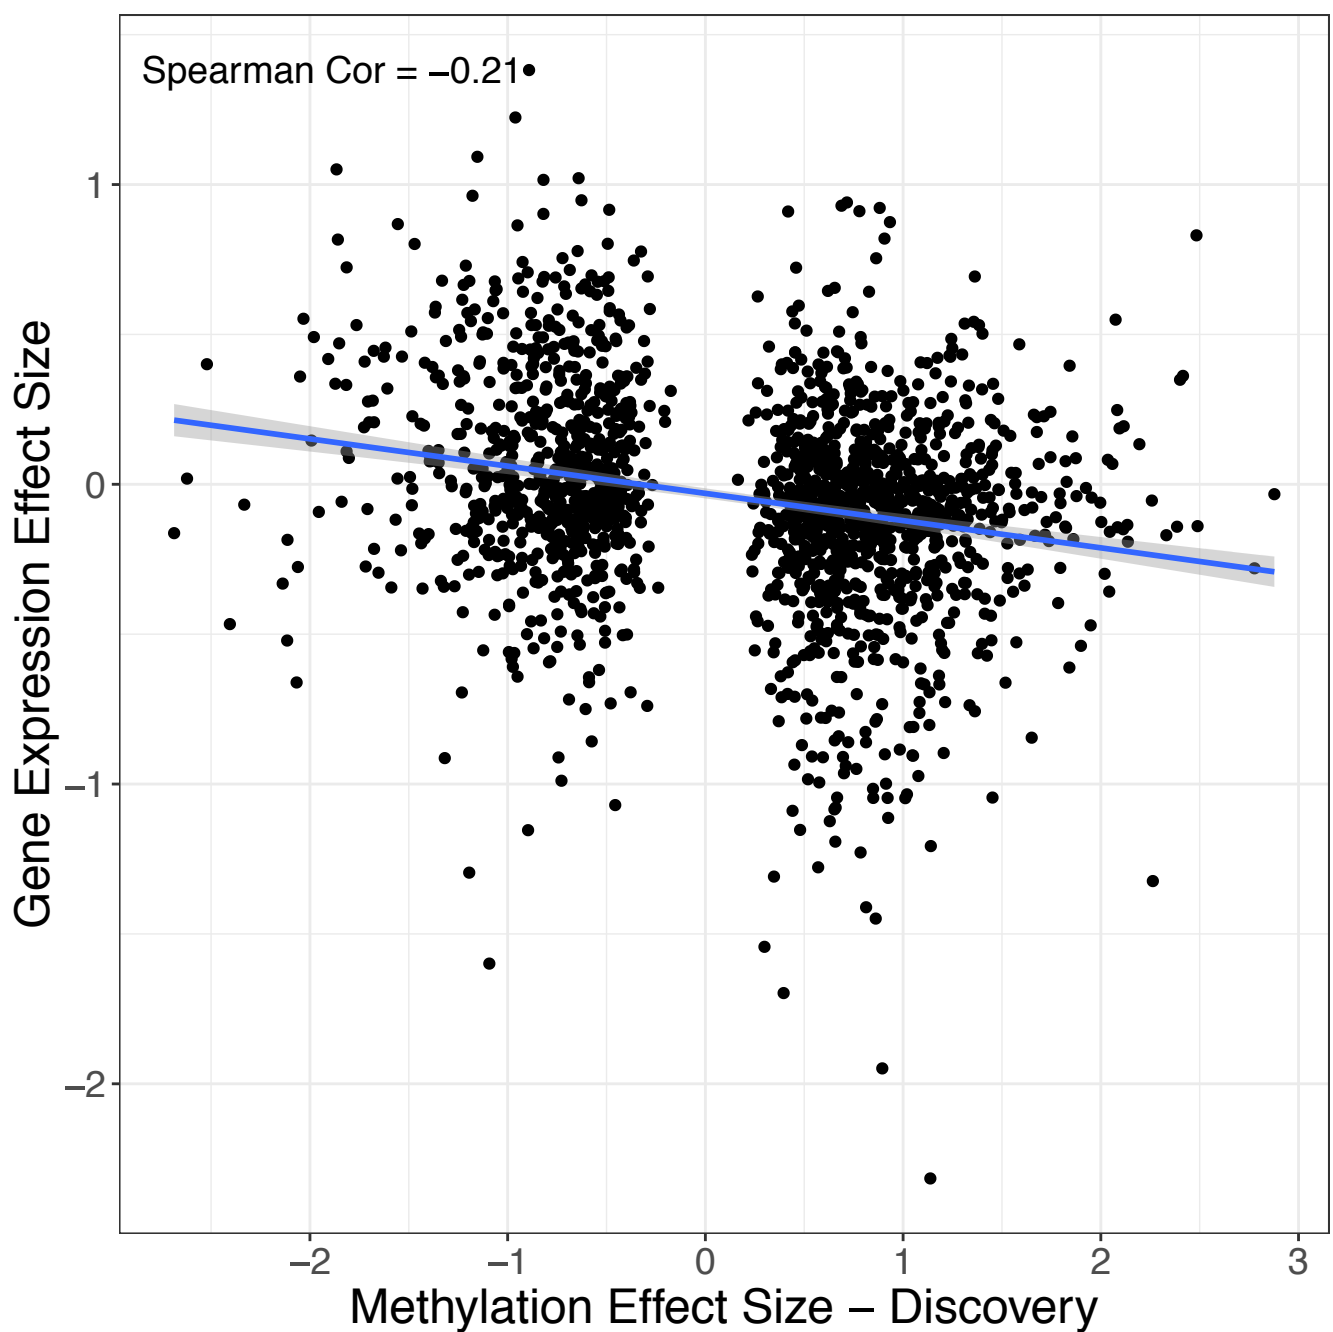

**Supplemental Figure 2.** Spearman correlation between the discovery methylation effect size and gene expression effectsize across the 1,801 differentially methylated genes

## KRT8: chemotherapy resistant vs sensitive cell lines

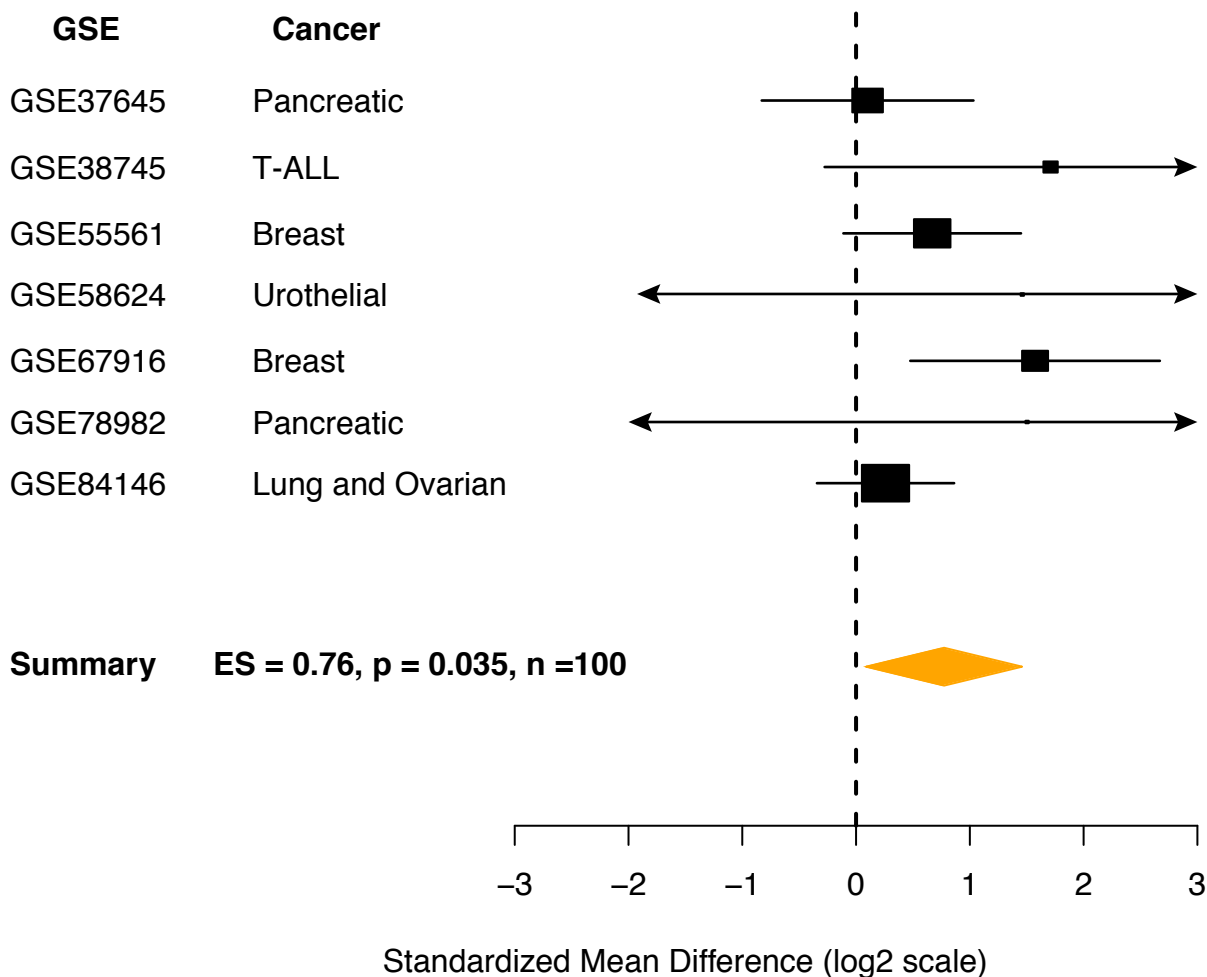

**Supplemental Figure 3.** Expression of KRT8 in chemotherapy resistant cancer cell lines compared to chemotherapy sensitive cell lines in the same tissue across seven independent datasets. ES = Effect size.

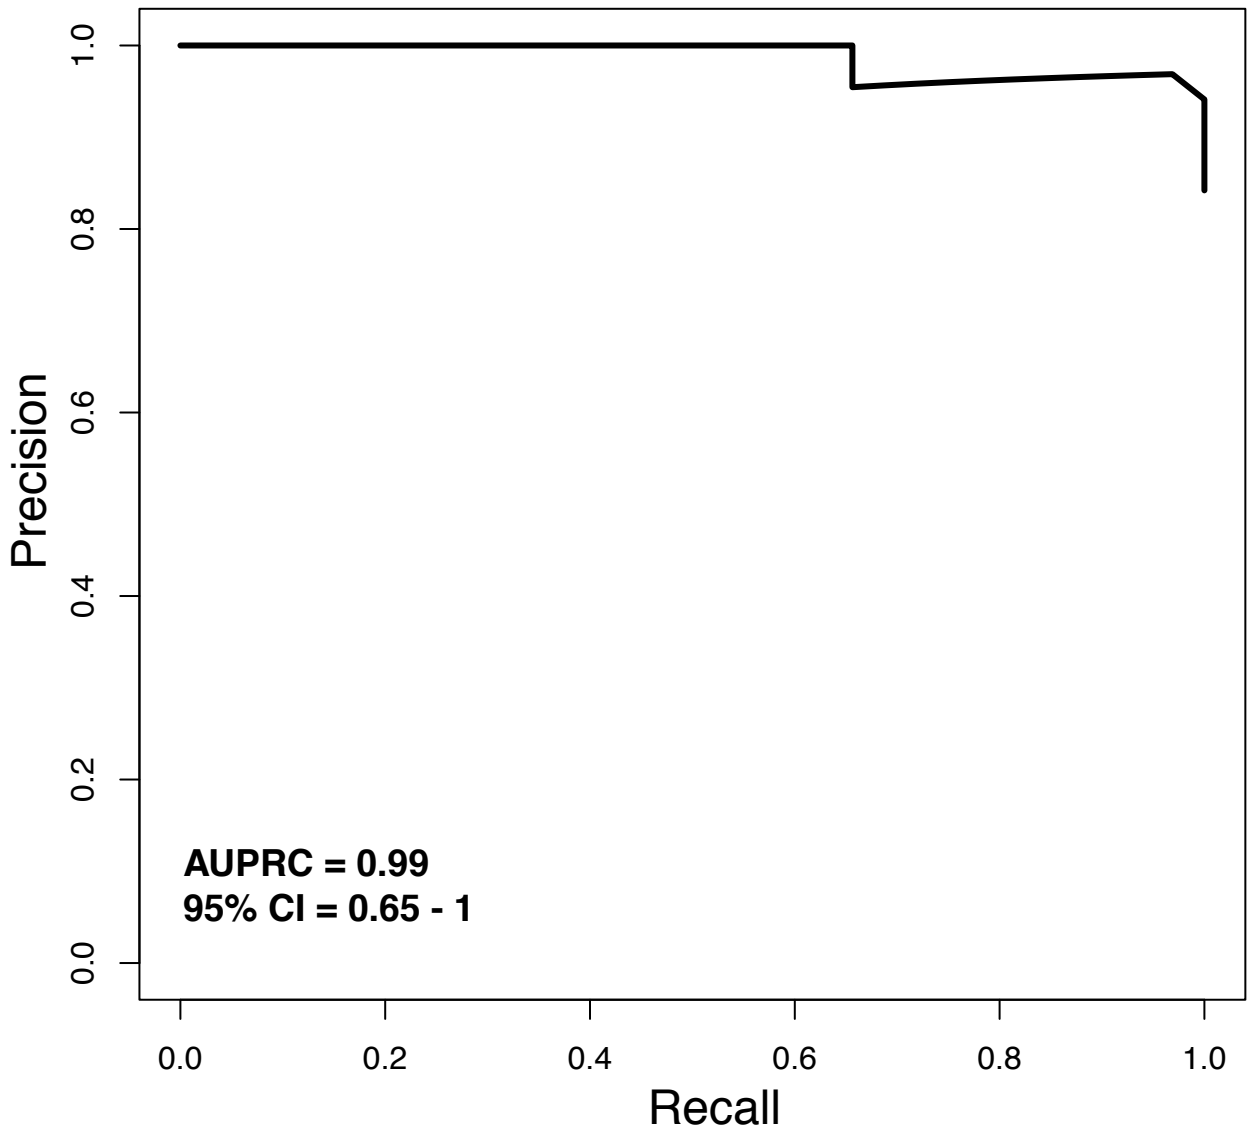

**Supplemental Figure 4.** Precision-Recall curve for discriminating pancreatic cancer patients (n = 32) from healthy controls (n = 6) by serum KRT8 as measured by ELISA.

**Supplemental Table 1.** Reactome pathway analysis of 100 most KRT8-correlated and anticorrelated genes. Correlations were determined from expression levels within single cells.

| Upregulated | Pathway                                                   | p.Geomean | Stat mean | P val | qval  | set size | exp1  |
|-------------|-----------------------------------------------------------|-----------|-----------|-------|-------|----------|-------|
|             | GO:0034220 ion transmembrane transport                    | 0.021     | 2.185     | 0.021 | 0.921 | 15.000   | 0.021 |
|             | GO:0007017 microtubule-based process                      | 0.030     | 1.975     | 0.030 | 0.921 | 15.000   | 0.030 |
|             | GO:0006091 generation of precursor metabolites and energy | 0.039     | 1.884     | 0.039 | 0.921 | 12.000   | 0.039 |
|             | GO:0000226 microtubule cytoskeleton organization          | 0.040     | 1.866     | 0.040 | 0.921 | 10.000   | 0.040 |
|             | GO:0045088 regulation of innate immune response           | 0.062     | 1.633     | 0.062 | 0.921 | 12.000   | 0.062 |
|             | GO:0034097 response to cytokine stimulus                  | 0.064     | 1.544     | 0.064 | 0.921 | 31.000   | 0.064 |
|             |                                                           |           |           |       |       |          |       |
|             |                                                           |           |           |       |       |          |       |
| Down        |                                                           |           |           |       |       |          |       |
|             | GO:0007155 cell adhesion                                  | 0.006     | -2.554    | 0.006 | 0.822 | 49.000   | 0.006 |
|             | GO:0022610 biological adhesion                            | 0.006     | -2.554    | 0.006 | 0.822 | 49.000   | 0.006 |
|             | GO:0030155 regulation of cell adhesion                    | 0.007     | -2.674    | 0.007 | 0.822 | 14.000   | 0.007 |
|             | GO:0016337 cell-cell adhesion                             | 0.009     | -2.497    | 0.009 | 0.822 | 19.000   | 0.009 |
|             | GO:0051336 regulation of hydrolase activity               | 0.027     | -1.956    | 0.027 | 0.822 | 42.000   | 0.027 |
|             | GO:0006790 sulfur compound metabolic process              | 0.045     | -1.810    | 0.045 | 0.822 | 10.000   | 0.045 |

**Supplementary Table 2.** Correlation of six genes with KRT8 expression in bulk tissue microarrays

| Cancer                    | Gene Name | effectSize | effectSizeStandardError | effectSizePval | effectSizeFDR | # Studies |
|---------------------------|-----------|------------|-------------------------|----------------|---------------|-----------|
| Lung adenocarcinoma       | GPX2      | 0.85825435 | 0.10343277              | 1.06E-16       | 8.33E-16      | 12        |
|                           | SFN       | 1.73484346 | 0.24509068              | 1.46E-12       | 7.97E-12      | 12        |
|                           | GSTP1     | 0.36090358 | 0.11225354              | 0.0013041      | 0.0025582     | 12        |
|                           | COX6A1    | 0.38921725 | 0.16041534              | 0.01525326     | 0.02462262    | 11        |
|                           | PRDX5     | -0.2398083 | 0.12480822              | 0.05467952     | 0.07900236    | 10        |
|                           | TXNRD1    | 0.20785324 | 0.12609836              | 0.09928248     | 0.13484462    | 12        |
| Breast invasive carcinoma | GPX2      | -0.2375308 | 0.04801474              | 7.54E-07       | 1.35E-05      | 11        |
|                           | GSTP1     | -0.3034343 | 0.08920859              | 0.00067041     | 0.00381338    | 11        |
|                           | SFN       | 0.61918602 | 0.25434585              | 0.01491545     | 0.04712083    | 9         |
|                           | COX6A1    | 0.34303382 | 0.19992861              | 0.08620203     | 0.19004273    | 10        |
|                           | PRDX5     | 0.06965973 | 0.15040264              | 0.64325327     | 0.78503691    | 10        |
|                           | TXNRD1    | -0.013877  | 0.09478392              | 0.88360029     | 0.937214      | 11        |
| Colon adenocarcinoma      | TXNRD1    | 0.29526367 | 0.14820284              | 0.04633878     | 0.57457234    | 9         |
|                           | SFN       | 0.16939059 | 0.14314671              | 0.23667617     | 0.81649353    | 9         |
|                           | COX6A1    | 0.21129821 | 0.18870124              | 0.26282031     | 0.83222568    | 10        |
|                           | GSTP1     | 0.11125449 | 0.18337014              | 0.54403616     | 0.93600853    | 9         |
|                           | GPX2      | -0.0618429 | 0.1610988               | 0.70106622     | 0.96388548    | 10        |
|                           | PRDX5     | -0.0106303 | 0.1627399               | 0.9479186      | 0.99373678    | 7         |
| Pancreatic carcinoma      | SFN       | 1.55433781 | 0.15874762              | 1.23E-22       | 5.72E-20      | 11        |
|                           | GSTP1     | 1.24803455 | 0.19765895              | 2.72E-10       | 1.26E-08      | 11        |
|                           | GPX2      | 1.09113993 | 0.17950857              | 1.21E-09       | 4.79E-08      | 12        |
|                           | TXNRD1    | 0.79114389 | 0.21840454              | 0.00029191     | 0.00173964    | 12        |
|                           | PRDX5     | 0.78212231 | 0.22006658              | 0.00037938     | 0.00214582    | 11        |
|                           | COX6A1    | 0.17429096 | 0.16489239              | 0.2905124      | 0.40571164    | 11        |
| Ovarian carcinoma         | SFN       | 1.60402136 | 0.26433707              | 1.29E-09       | 1.11E-07      | 12        |
|                           | GSTP1     | 1.33878562 | 0.46126096              | 0.00370259     | 0.0316481     | 12        |
|                           | COX6A1    | 0.59523921 | 0.23225486              | 0.01038107     | 0.06663287    | 12        |
|                           | TXNRD1    | -0.4461765 | 0.23997164              | 0.06298629     | 0.22142444    | 12        |
|                           | GPX2      | -0.2316358 | 0.18909074              | 0.22057584     | 0.46257419    | 12        |
|                           | PRDX5     | 0.17328605 | 0.39255309              | 0.65889926     | 0.81042429    | 10        |

**Supplementary Table 3.** Demographic information for the adenocarcinoma patients profiled by tissue microarray.

---

|                                |               |
|--------------------------------|---------------|
| n                              | 294           |
| Grade (%)                      |               |
| well                           | 39 (13.3)     |
| moderate                       | 167 (56.8)    |
| poor                           | 82 (27.9)     |
| undifferentiated               | 1 (0.3)       |
| not stated                     | 4 (1.7)       |
| Age (mean (SD))                | 67.70 (10.49) |
| Sex = male (%)                 | 135 (45.9)    |
| Primary tumor size (mean (SD)) | 3.45 (2.00)   |
| Subtype (%)                    |               |
| Adenocarcinoma                 | 228 (77.6)    |
| Squamous cell                  | 66 (22.4)     |
| Stage (mean (SD))              | 1.64 (0.76)   |

---

**Supplementary Table 4.** Demographic information for the 176 patients with pancreatic cancer.

| Characteristic      | Overall         |
|---------------------|-----------------|
| n                   | 176             |
| Age (mean (SD))     | 64.85 (10.77)   |
| Male (%)            | 96 (54.5)       |
| Stage (%)           |                 |
| i                   | 1 ( 0.6)        |
| ia                  | 5 ( 2.8)        |
| ib                  | 15 ( 8.5)       |
| iia                 | 28 (15.9)       |
| iib                 | 117 (66.5)      |
| iii                 | 3 ( 1.7)        |
| iv                  | 4 ( 2.3)        |
| not reported        | 3 ( 1.7)        |
| Days observed (mean | 570.65 (478.36) |
| FPKM (mean (SD))    | 386.77 (218.16) |
| Died (%)            | 92 (52.3)       |



## Supplementary Figure 5. Demographic information on 32 patients with pancreatic cancer.

---

|                                     |                  |
|-------------------------------------|------------------|
| Patients' age (years), mean (range) | 69 (43 - 85)     |
| Female, <i>n</i> (%)                | 12 (38)          |
| Tumor grade, <i>n</i> (%)           |                  |
| Well differentiated                 | 7 (22)           |
| Moderately differentiated           | 19 (59)          |
| Poorly differentiated               | 6 (19)           |
| Lymph node status, <i>n</i> (%)     |                  |
| Positive                            | 16 (50)          |
| Negative                            | 16 (50)          |
| Resection margin, <i>n</i> (%)      |                  |
| Positive                            | 10 (31)          |
| Negative                            | 22 (69)          |
| Tumor size (cm), median (range)     | 3.80 (1.10-6.00) |
| Bilirubin (mg/dL), mean (range)     | 0.65 (0.5-1.3)   |
| CA19-9 (U/ml), mean (range)         | 26059 (1-780486) |

---

**Supplementary Table 6**

| Dataset   | Link                                                                                                                                    | Organ      |
|-----------|-----------------------------------------------------------------------------------------------------------------------------------------|------------|
| GSE2514   | <a href="https://www.ncbi.nlm.nih.gov/geo/query/acc.cgi?acc=GSE2514">https://www.ncbi.nlm.nih.gov/geo/query/acc.cgi?acc=GSE2514</a>     | Lung       |
| GSE10072  | <a href="https://www.ncbi.nlm.nih.gov/geo/query/acc.cgi?acc=GSE10072">https://www.ncbi.nlm.nih.gov/geo/query/acc.cgi?acc=GSE10072</a>   | Lung       |
| GSE12236  | <a href="https://www.ncbi.nlm.nih.gov/geo/query/acc.cgi?acc=GSE12236">https://www.ncbi.nlm.nih.gov/geo/query/acc.cgi?acc=GSE12236</a>   | Lung       |
| GSE19188  | <a href="https://www.ncbi.nlm.nih.gov/geo/query/acc.cgi?acc=GSE19188">https://www.ncbi.nlm.nih.gov/geo/query/acc.cgi?acc=GSE19188</a>   | Lung       |
| GSE27262  | <a href="https://www.ncbi.nlm.nih.gov/geo/query/acc.cgi?acc=GSE27262">https://www.ncbi.nlm.nih.gov/geo/query/acc.cgi?acc=GSE27262</a>   | Lung       |
| GSE30219  | <a href="https://www.ncbi.nlm.nih.gov/geo/query/acc.cgi?acc=GSE30219">https://www.ncbi.nlm.nih.gov/geo/query/acc.cgi?acc=GSE30219</a>   | Lung       |
| GSE31210  | <a href="https://www.ncbi.nlm.nih.gov/geo/query/acc.cgi?acc=GSE31210">https://www.ncbi.nlm.nih.gov/geo/query/acc.cgi?acc=GSE31210</a>   | Lung       |
| GSE32863  | <a href="https://www.ncbi.nlm.nih.gov/geo/query/acc.cgi?acc=GSE32863">https://www.ncbi.nlm.nih.gov/geo/query/acc.cgi?acc=GSE32863</a>   | Lung       |
| GSE43458  | <a href="https://www.ncbi.nlm.nih.gov/geo/query/acc.cgi?acc=GSE43458">https://www.ncbi.nlm.nih.gov/geo/query/acc.cgi?acc=GSE43458</a>   | Lung       |
| GSE43767  | <a href="https://www.ncbi.nlm.nih.gov/geo/query/acc.cgi?acc=GSE43767">https://www.ncbi.nlm.nih.gov/geo/query/acc.cgi?acc=GSE43767</a>   | Lung       |
| GSE63459  | <a href="https://www.ncbi.nlm.nih.gov/geo/query/acc.cgi?acc=GSE63459">https://www.ncbi.nlm.nih.gov/geo/query/acc.cgi?acc=GSE63459</a>   | Lung       |
| GSE75037  | <a href="https://www.ncbi.nlm.nih.gov/geo/query/acc.cgi?acc=GSE75037">https://www.ncbi.nlm.nih.gov/geo/query/acc.cgi?acc=GSE75037</a>   | Lung       |
| GSE42568  | <a href="https://www.ncbi.nlm.nih.gov/geo/query/acc.cgi?acc=GSE42568">https://www.ncbi.nlm.nih.gov/geo/query/acc.cgi?acc=GSE42568</a>   | Breast     |
| GSE20711  | <a href="https://www.ncbi.nlm.nih.gov/geo/query/acc.cgi?acc=GSE20711">https://www.ncbi.nlm.nih.gov/geo/query/acc.cgi?acc=GSE20711</a>   | Breast     |
| GSE15852  | <a href="https://www.ncbi.nlm.nih.gov/geo/query/acc.cgi?acc=GSE15852">https://www.ncbi.nlm.nih.gov/geo/query/acc.cgi?acc=GSE15852</a>   | Breast     |
| GSE37751  | <a href="https://www.ncbi.nlm.nih.gov/geo/query/acc.cgi?acc=GSE37751">https://www.ncbi.nlm.nih.gov/geo/query/acc.cgi?acc=GSE37751</a>   | Breast     |
| GSE13293  | <a href="https://www.ncbi.nlm.nih.gov/geo/query/acc.cgi?acc=GSE13293">https://www.ncbi.nlm.nih.gov/geo/query/acc.cgi?acc=GSE13293</a>   | Breast     |
| GSE22820  | <a href="https://www.ncbi.nlm.nih.gov/geo/query/acc.cgi?acc=GSE22820">https://www.ncbi.nlm.nih.gov/geo/query/acc.cgi?acc=GSE22820</a>   | Breast     |
| GSE31448  | <a href="https://www.ncbi.nlm.nih.gov/geo/query/acc.cgi?acc=GSE31448">https://www.ncbi.nlm.nih.gov/geo/query/acc.cgi?acc=GSE31448</a>   | Breast     |
| GSE54002  | <a href="https://www.ncbi.nlm.nih.gov/geo/query/acc.cgi?acc=GSE54002">https://www.ncbi.nlm.nih.gov/geo/query/acc.cgi?acc=GSE54002</a>   | Breast     |
| GSE4382   | <a href="https://www.ncbi.nlm.nih.gov/geo/query/acc.cgi?acc=GSE4382">https://www.ncbi.nlm.nih.gov/geo/query/acc.cgi?acc=GSE4382</a>     | Breast     |
| GSE109169 | <a href="https://www.ncbi.nlm.nih.gov/geo/query/acc.cgi?acc=GSE109169">https://www.ncbi.nlm.nih.gov/geo/query/acc.cgi?acc=GSE109169</a> | Breast     |
| GSE93601  | <a href="https://www.ncbi.nlm.nih.gov/geo/query/acc.cgi?acc=GSE93601">https://www.ncbi.nlm.nih.gov/geo/query/acc.cgi?acc=GSE93601</a>   | Breast     |
| MTAB10971 | <a href="https://www.ncbi.nlm.nih.gov/geo/query/acc.cgi?acc=MTAB10971">https://www.ncbi.nlm.nih.gov/geo/query/acc.cgi?acc=MTAB10971</a> | Ovarian    |
| MTAB18520 | <a href="https://www.ncbi.nlm.nih.gov/geo/query/acc.cgi?acc=MTAB18520">https://www.ncbi.nlm.nih.gov/geo/query/acc.cgi?acc=MTAB18520</a> | Ovarian    |
| MTAB25427 | <a href="https://www.ncbi.nlm.nih.gov/geo/query/acc.cgi?acc=MTAB25427">https://www.ncbi.nlm.nih.gov/geo/query/acc.cgi?acc=MTAB25427</a> | Ovarian    |
| MTAB6008  | <a href="https://www.ncbi.nlm.nih.gov/geo/query/acc.cgi?acc=MTAB6008">https://www.ncbi.nlm.nih.gov/geo/query/acc.cgi?acc=MTAB6008</a>   | Ovarian    |
| MTAB14001 | <a href="https://www.ncbi.nlm.nih.gov/geo/query/acc.cgi?acc=MTAB14001">https://www.ncbi.nlm.nih.gov/geo/query/acc.cgi?acc=MTAB14001</a> | Ovarian    |
| MTAB19352 | <a href="https://www.ncbi.nlm.nih.gov/geo/query/acc.cgi?acc=MTAB19352">https://www.ncbi.nlm.nih.gov/geo/query/acc.cgi?acc=MTAB19352</a> | Ovarian    |
| MTAB26712 | <a href="https://www.ncbi.nlm.nih.gov/geo/query/acc.cgi?acc=MTAB26712">https://www.ncbi.nlm.nih.gov/geo/query/acc.cgi?acc=MTAB26712</a> | Ovarian    |
| GSE66957  | <a href="https://www.ncbi.nlm.nih.gov/geo/query/acc.cgi?acc=GSE66957">https://www.ncbi.nlm.nih.gov/geo/query/acc.cgi?acc=GSE66957</a>   | Ovarian    |
| GSE54388  | <a href="https://www.ncbi.nlm.nih.gov/geo/query/acc.cgi?acc=GSE54388">https://www.ncbi.nlm.nih.gov/geo/query/acc.cgi?acc=GSE54388</a>   | Ovarian    |
| GSE40595  | <a href="https://www.ncbi.nlm.nih.gov/geo/query/acc.cgi?acc=GSE40595">https://www.ncbi.nlm.nih.gov/geo/query/acc.cgi?acc=GSE40595</a>   | Ovarian    |
| GSE37582  | <a href="https://www.ncbi.nlm.nih.gov/geo/query/acc.cgi?acc=GSE37582">https://www.ncbi.nlm.nih.gov/geo/query/acc.cgi?acc=GSE37582</a>   | Ovarian    |
| GSE36668  | <a href="https://www.ncbi.nlm.nih.gov/geo/query/acc.cgi?acc=GSE36668">https://www.ncbi.nlm.nih.gov/geo/query/acc.cgi?acc=GSE36668</a>   | Ovarian    |
| GSE46234  | <a href="https://www.ncbi.nlm.nih.gov/geo/query/acc.cgi?acc=GSE46234">https://www.ncbi.nlm.nih.gov/geo/query/acc.cgi?acc=GSE46234</a>   | Pancreatic |
| GSE63111  | <a href="https://www.ncbi.nlm.nih.gov/geo/query/acc.cgi?acc=GSE63111">https://www.ncbi.nlm.nih.gov/geo/query/acc.cgi?acc=GSE63111</a>   | Pancreatic |
| GSE62452  | <a href="https://www.ncbi.nlm.nih.gov/geo/query/acc.cgi?acc=GSE62452">https://www.ncbi.nlm.nih.gov/geo/query/acc.cgi?acc=GSE62452</a>   | Pancreatic |
| GSE56560  | <a href="https://www.ncbi.nlm.nih.gov/geo/query/acc.cgi?acc=GSE56560">https://www.ncbi.nlm.nih.gov/geo/query/acc.cgi?acc=GSE56560</a>   | Pancreatic |
| GSE55643  | <a href="https://www.ncbi.nlm.nih.gov/geo/query/acc.cgi?acc=GSE55643">https://www.ncbi.nlm.nih.gov/geo/query/acc.cgi?acc=GSE55643</a>   | Pancreatic |
| GSE43795  | <a href="https://www.ncbi.nlm.nih.gov/geo/query/acc.cgi?acc=GSE43795">https://www.ncbi.nlm.nih.gov/geo/query/acc.cgi?acc=GSE43795</a>   | Pancreatic |

|           |                                                                                                                                         |            |
|-----------|-----------------------------------------------------------------------------------------------------------------------------------------|------------|
| GSE23397  | <a href="https://www.ncbi.nlm.nih.gov/geo/query/acc.cgi?acc=GSE23397">https://www.ncbi.nlm.nih.gov/geo/query/acc.cgi?acc=GSE23397</a>   | Pancreatic |
| GSE39751  | <a href="https://www.ncbi.nlm.nih.gov/geo/query/acc.cgi?acc=GSE39751">https://www.ncbi.nlm.nih.gov/geo/query/acc.cgi?acc=GSE39751</a>   | Pancreatic |
| GSE28735  | <a href="https://www.ncbi.nlm.nih.gov/geo/query/acc.cgi?acc=GSE28735">https://www.ncbi.nlm.nih.gov/geo/query/acc.cgi?acc=GSE28735</a>   | Pancreatic |
| GSE15932  | <a href="https://www.ncbi.nlm.nih.gov/geo/query/acc.cgi?acc=GSE15932">https://www.ncbi.nlm.nih.gov/geo/query/acc.cgi?acc=GSE15932</a>   | Pancreatic |
| GSE32676  | <a href="https://www.ncbi.nlm.nih.gov/geo/query/acc.cgi?acc=GSE32676">https://www.ncbi.nlm.nih.gov/geo/query/acc.cgi?acc=GSE32676</a>   | Pancreatic |
| GSE22780  | <a href="https://www.ncbi.nlm.nih.gov/geo/query/acc.cgi?acc=GSE22780">https://www.ncbi.nlm.nih.gov/geo/query/acc.cgi?acc=GSE22780</a>   | Pancreatic |
| GSE103512 | <a href="https://www.ncbi.nlm.nih.gov/geo/query/acc.cgi?acc=GSE103512">https://www.ncbi.nlm.nih.gov/geo/query/acc.cgi?acc=GSE103512</a> | Colon      |
| GSE89287  | <a href="https://www.ncbi.nlm.nih.gov/geo/query/acc.cgi?acc=GSE89287">https://www.ncbi.nlm.nih.gov/geo/query/acc.cgi?acc=GSE89287</a>   | Colon      |
| GSE76855  | <a href="https://www.ncbi.nlm.nih.gov/geo/query/acc.cgi?acc=GSE76855">https://www.ncbi.nlm.nih.gov/geo/query/acc.cgi?acc=GSE76855</a>   | Colon      |
| GSE62932  | <a href="https://www.ncbi.nlm.nih.gov/geo/query/acc.cgi?acc=GSE62932">https://www.ncbi.nlm.nih.gov/geo/query/acc.cgi?acc=GSE62932</a>   | Colon      |
| GSE68468  | <a href="https://www.ncbi.nlm.nih.gov/geo/query/acc.cgi?acc=GSE68468">https://www.ncbi.nlm.nih.gov/geo/query/acc.cgi?acc=GSE68468</a>   | Colon      |
| GSE62321  | <a href="https://www.ncbi.nlm.nih.gov/geo/query/acc.cgi?acc=GSE62321">https://www.ncbi.nlm.nih.gov/geo/query/acc.cgi?acc=GSE62321</a>   | Colon      |
| GSE49355  | <a href="https://www.ncbi.nlm.nih.gov/geo/query/acc.cgi?acc=GSE49355">https://www.ncbi.nlm.nih.gov/geo/query/acc.cgi?acc=GSE49355</a>   | Colon      |
| GSE39582  | <a href="https://www.ncbi.nlm.nih.gov/geo/query/acc.cgi?acc=GSE39582">https://www.ncbi.nlm.nih.gov/geo/query/acc.cgi?acc=GSE39582</a>   | Colon      |
| GSE41328  | <a href="https://www.ncbi.nlm.nih.gov/geo/query/acc.cgi?acc=GSE41328">https://www.ncbi.nlm.nih.gov/geo/query/acc.cgi?acc=GSE41328</a>   | Colon      |
| GSE41258  | <a href="https://www.ncbi.nlm.nih.gov/geo/query/acc.cgi?acc=GSE41258">https://www.ncbi.nlm.nih.gov/geo/query/acc.cgi?acc=GSE41258</a>   | Colon      |
